# Supplementary material for: Obesity Paradox in Caucasian Seniors: Results of the PolSenior Study
Source: PubMed Central journal article supplement (PMC6800404; doi:10.1007/s12603-019-1257-z), 2019-09-30

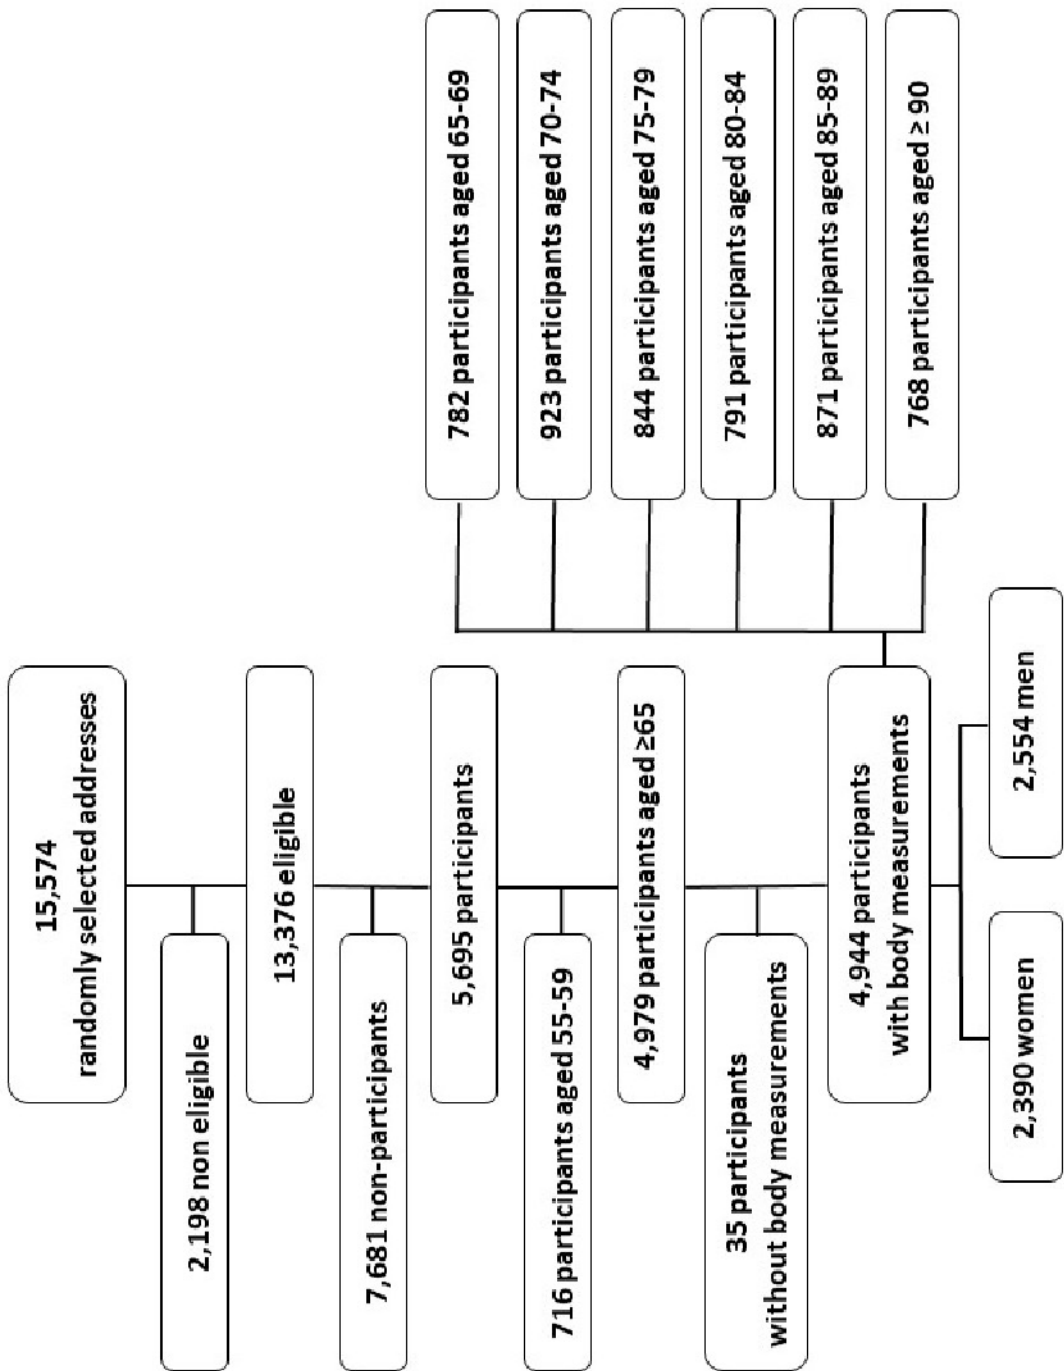

Supplement: 12603_2019_1257_MOESM1_ESM.pdf [file 12603_2019_1257_MOESM1_ESM.pdf]
